# Supplementary material for: Pluripotent Nontumorigenic Adipose Tissue‐Derived Muse Cells have Immunomodulatory Capacity Mediated by Transforming Growth Factor‐β1
Source: PubMed Central journal article supplement (PMC5442729; doi:10.5966/sctm.2016-0014), 2016-08-02
Supplement: SCT3-6-161-s001.pdf [file SCT3-6-161-s001.pdf]

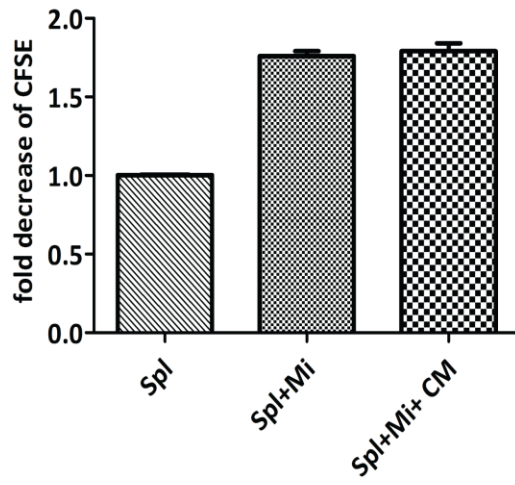

Muse-AT cells -CM did not disturb CD4+ T cells proliferation determined by CFSE dilution, n=3
